# Supplementary material
Source: Springer Nature journal article supplement (https://www.springermedizin.de/resource/supplementary/12985_2009_602_MOESM9_ESM.pdf/9608544)
Supplement: MOESM9 [file 9608544]

## Distribution of farm sites with confirmed and suspected ISA outbreaks accumulated up to December 01 2008 by region and geographic area

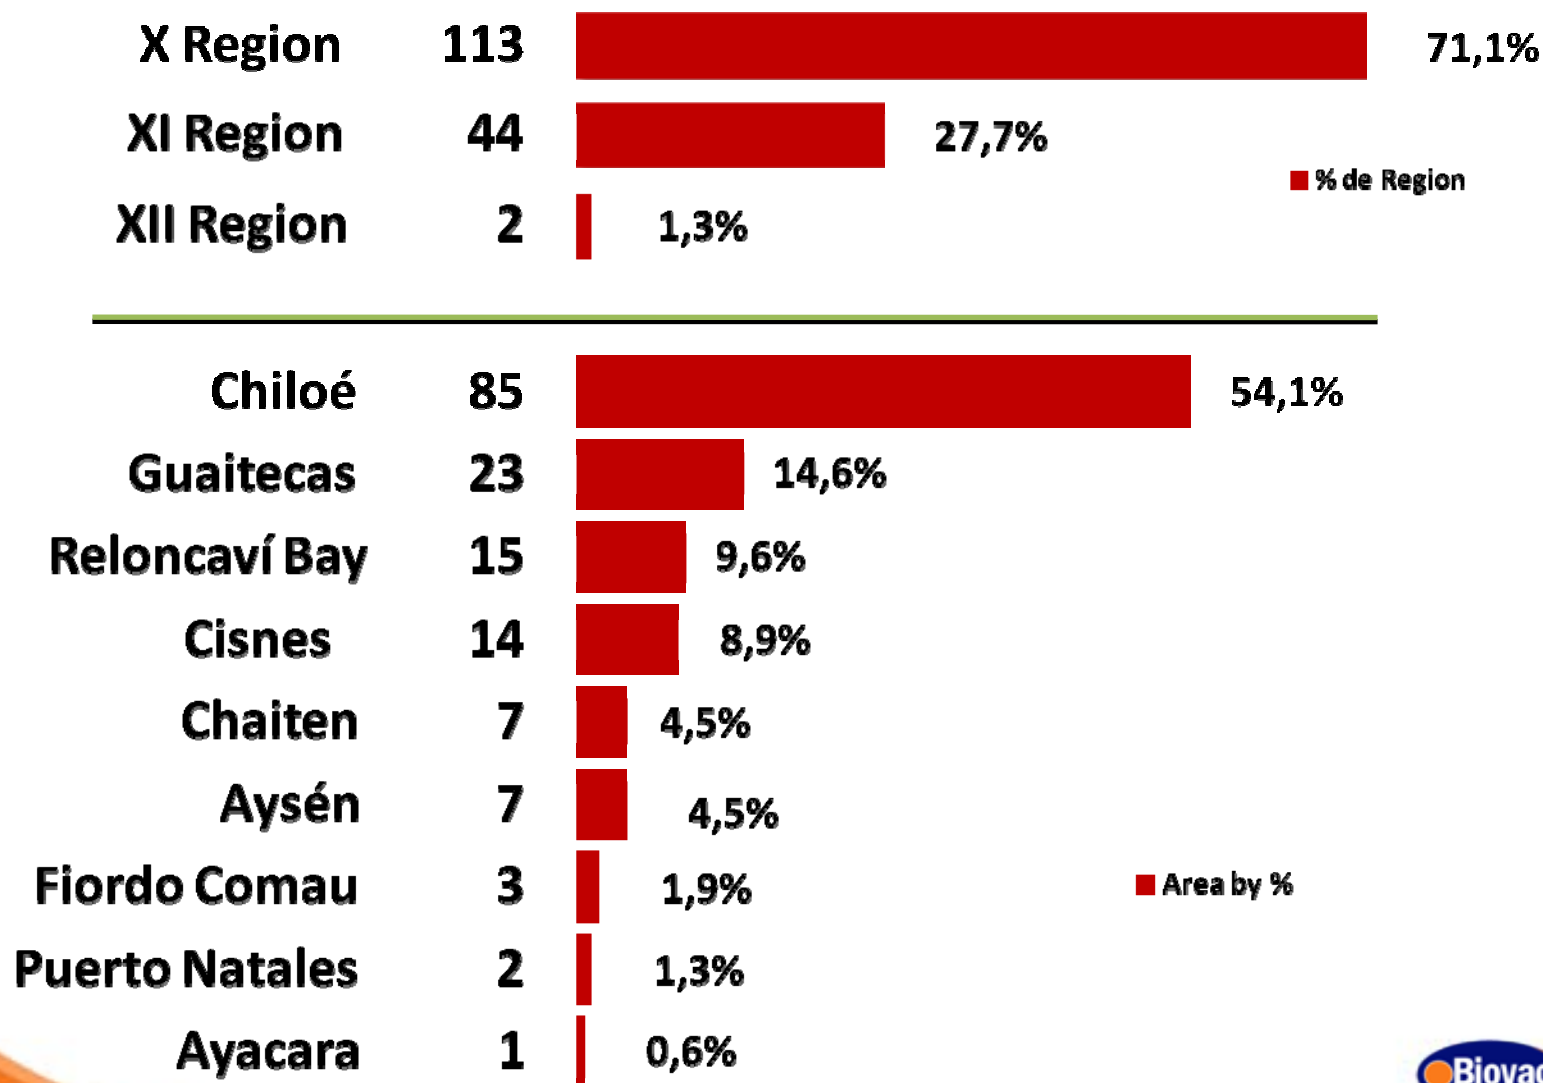

FIGURE 2
